# Supplementary material for: Metabolic characteristics of CD8+ T cell subsets in young and aged individuals are not predictive of functionality
Source: PubMed Central journal article supplement (PMC7275080; doi:10.1038/s41467-020-16633-7), 2020-06-05
Supplement: 41467_2020_16633_MOESM1_ESM.pdf [file 41467_2020_16633_MOESM1_ESM.pdf]

Supplementary Information Cover Page

**Metabolic Characteristics of Young and Aged CD8<sup>+</sup> T cell Subsets  
Do Not Predict Functionality**

Quinn et al

Manuscript No. NCOMMS-19-23928-T

## Supplementary Figure 1:

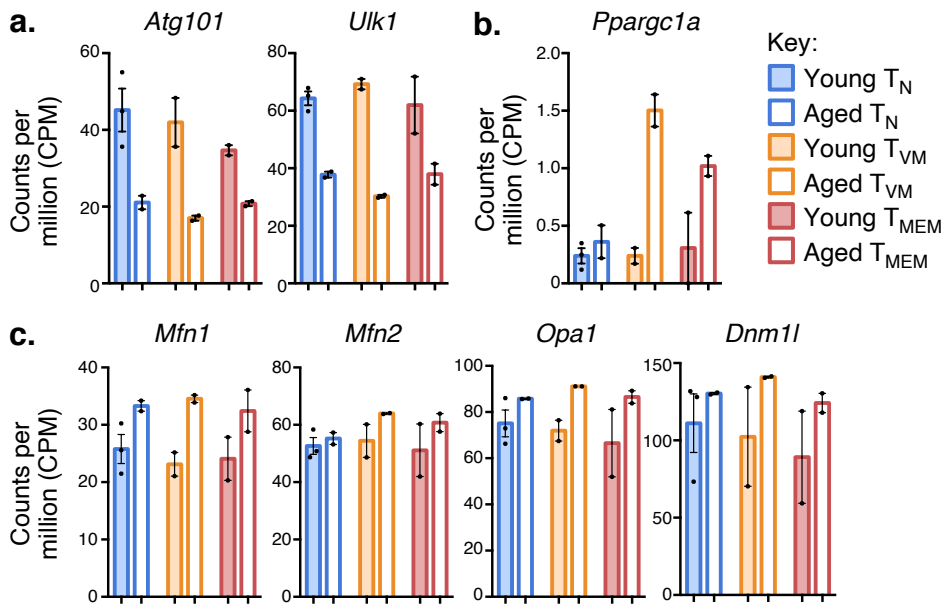

**Supplementary Figure 1.** Analysis of transcripts involved in mitophagy, mitochondrial biogenesis, fusion, and fission. Shown are the relative transcript levels of **a**, *Atg101* and *Ulk1*, **b**, *Pparg1a*, and **c**, *Mfn1*, *Mfn2*, *Opa1*, and *Dnm1l* from RNA-Seq data<sup>17</sup> from  $T_N$ ,  $T_{MEM}$ , and  $T_{VM}$  cells sorted and analysed *ex vivo* from naïve young and aged SPF mice. Shown is mean  $\pm$  standard error of the mean (SEM).

## Supplementary Figure 2:

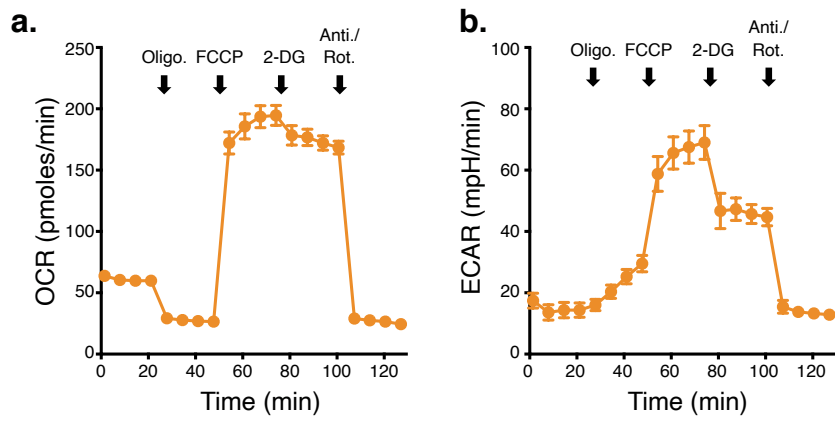

**Supplementary Figure 2.** Impact of glycolysis on SRC in TVM cells. **a**, OCR for sorted TVM cells from the spleens of uninfected young SPF mice and **b**, ECAR for the same cells, with the addition of 2-DG indicated (n=2, 2 experimental replicates).
